# Supplementary material for: Comparative Analysis of Transposable Elements in Genus Calliptamus Grasshoppers Revealed That Satellite DNA Contributes to Genome Size Variation
Source: MDPI journal article supplement (doi:10.3390/insects12090837), 2021-09-17
Supplement: s1 [file s1]

**Table S1. Genome data information used for TEs analysis.**

| Species Name          | Collection site                                | BioProject Number | SRR Number  | Genome Sizes (pg) | NGS Data used in Repeatexplorer2 (reads) | Individual Clustering (coverage) | Comparative Clustering (coverage) | No. of clusters* | No. of Super Clusters* |
|-----------------------|------------------------------------------------|-------------------|-------------|-------------------|------------------------------------------|----------------------------------|-----------------------------------|------------------|------------------------|
| <i>C. abbreviatus</i> | Changchun, Jilin, China                        | PRJNA638780       | SRR14826315 | 9.99              | 16,283,700                               | 0.5x                             | 0.03x                             | 345              | 292                    |
| <i>C. barbarus</i>    | Alxa Zuoqi, Alxa League, Inner Mongolia, China | PRJNA638780       | SRR14826314 | 10.37             | 16,903,100                               | 0.5x                             | 0.03x                             | 355              | 320                    |
| <i>C. italicus</i>    | Zhangye City, Gansu Province, China            | PRJNA638780       | SRR14826313 | 10.1              | 16,463,000                               | 0.5x                             | 0.03x                             | 479              | 453                    |

\*Clusters and Super Cluster above the threshold of 0.01%.

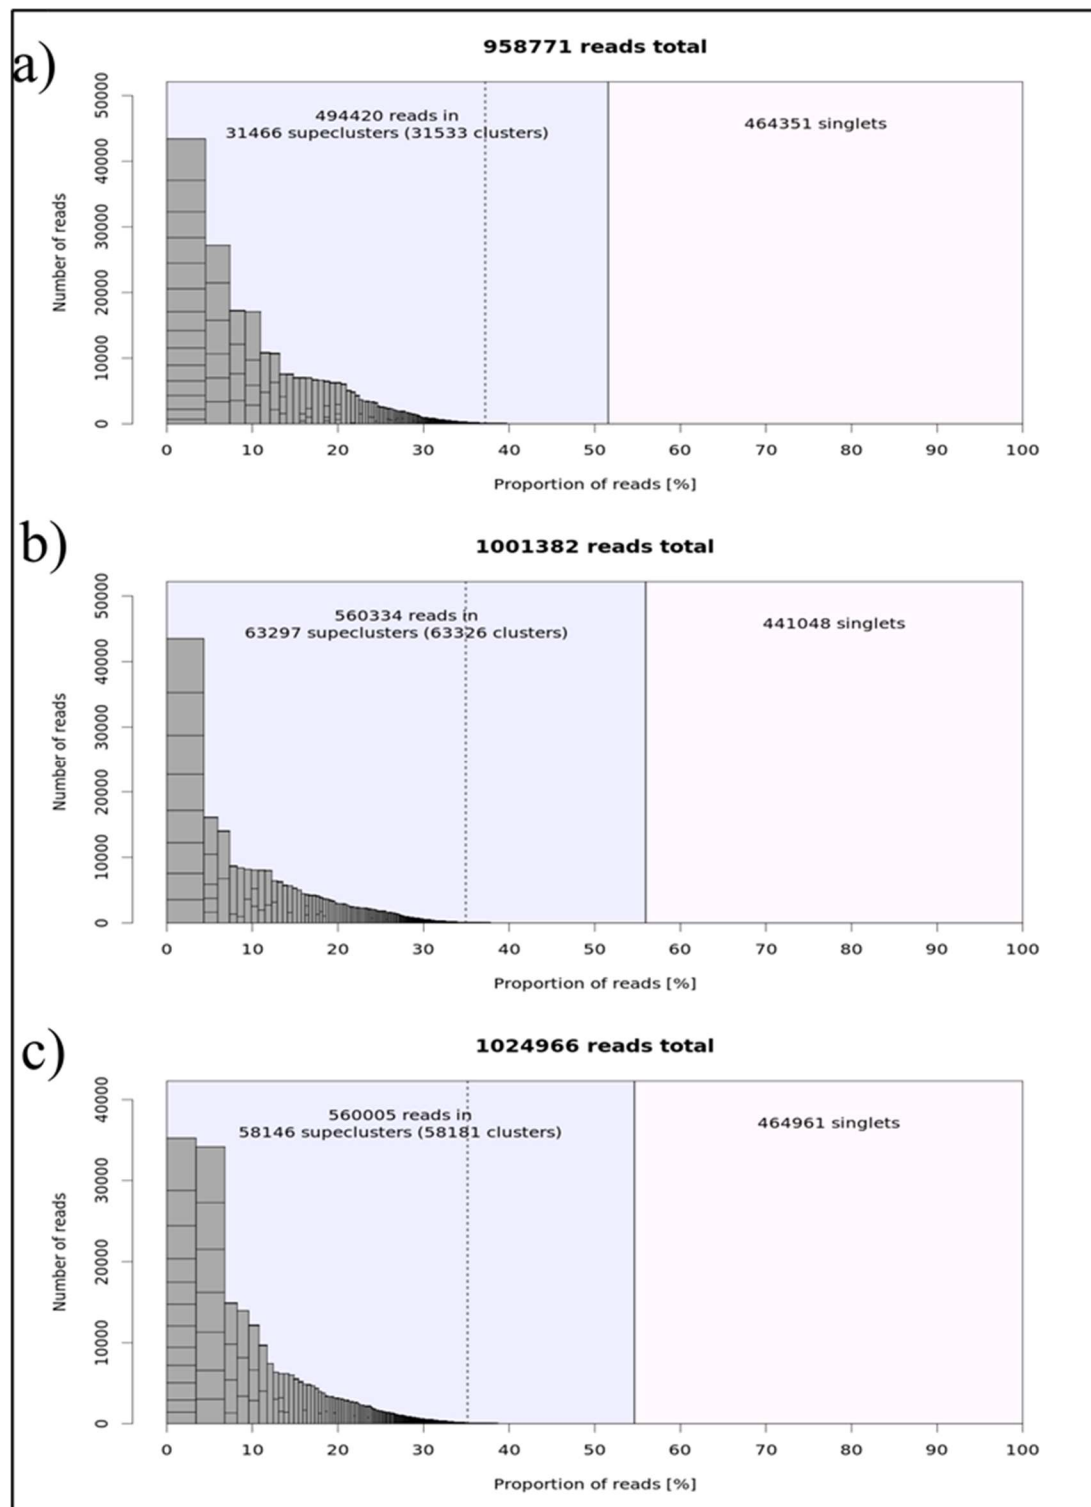

**Figure S1.** The graphical summary of individual clustering analysis of the genus *Calliptamus* species. The heights and widths of the bars denote superclusters, corresponding to the number of reads in the superclusters on y-axis and their proportions in all examined reads on x-axis. Individual clusters are represented by rectangles inside the supercluster bars. The proportions of clustered and single reads are shown in the blue and pink background panels, respectively. On the left of the dotted line are the top clusters. **a)** *C. abbreviatus*, **b)** *C. italicus*, **c)** *C. barbarus*.

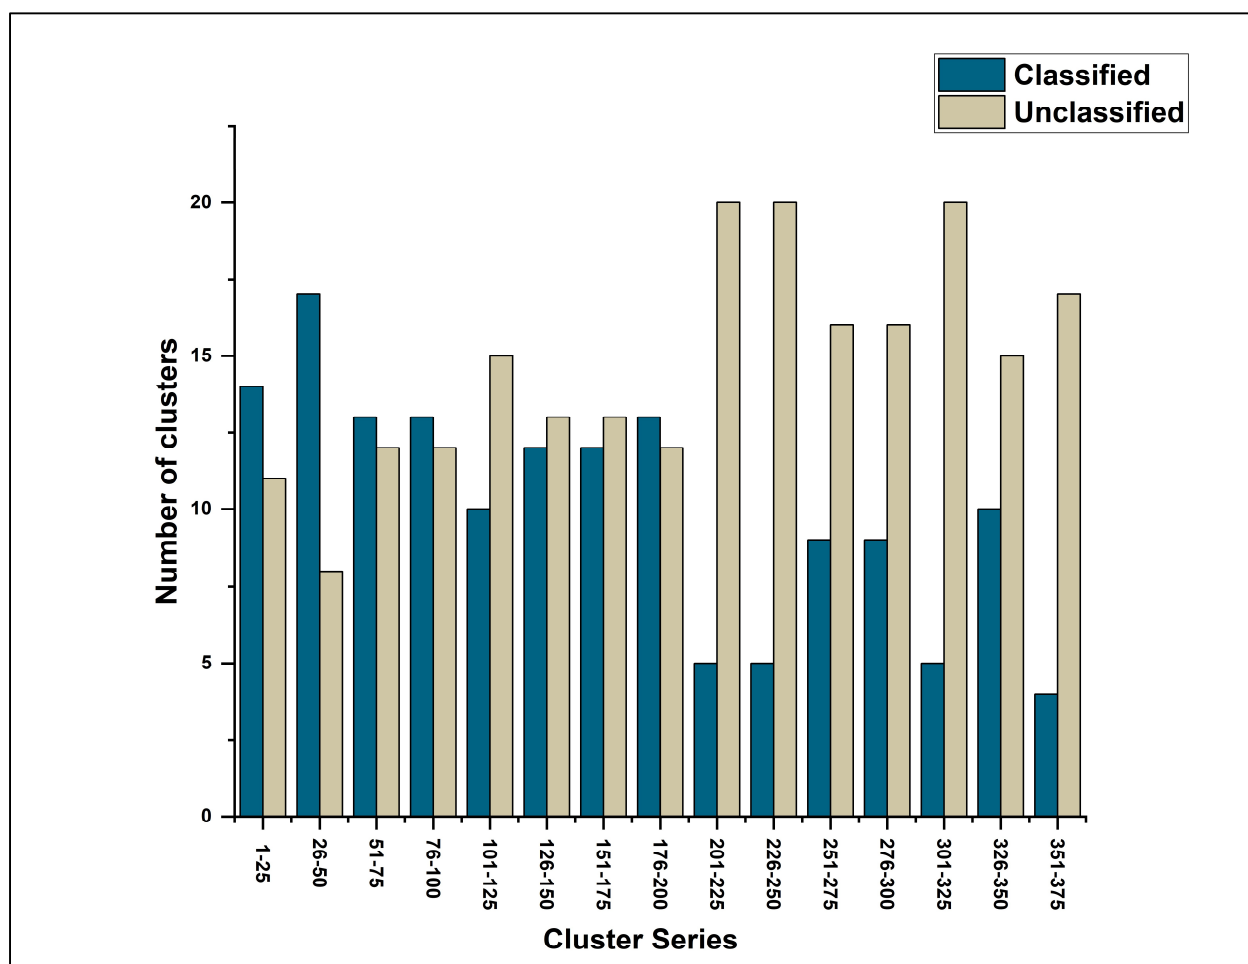

**Figure S2.** The proportion of annotation of classified and unclassified clusters by RepeatExplorer2. Clusters are arranged in ascending order.

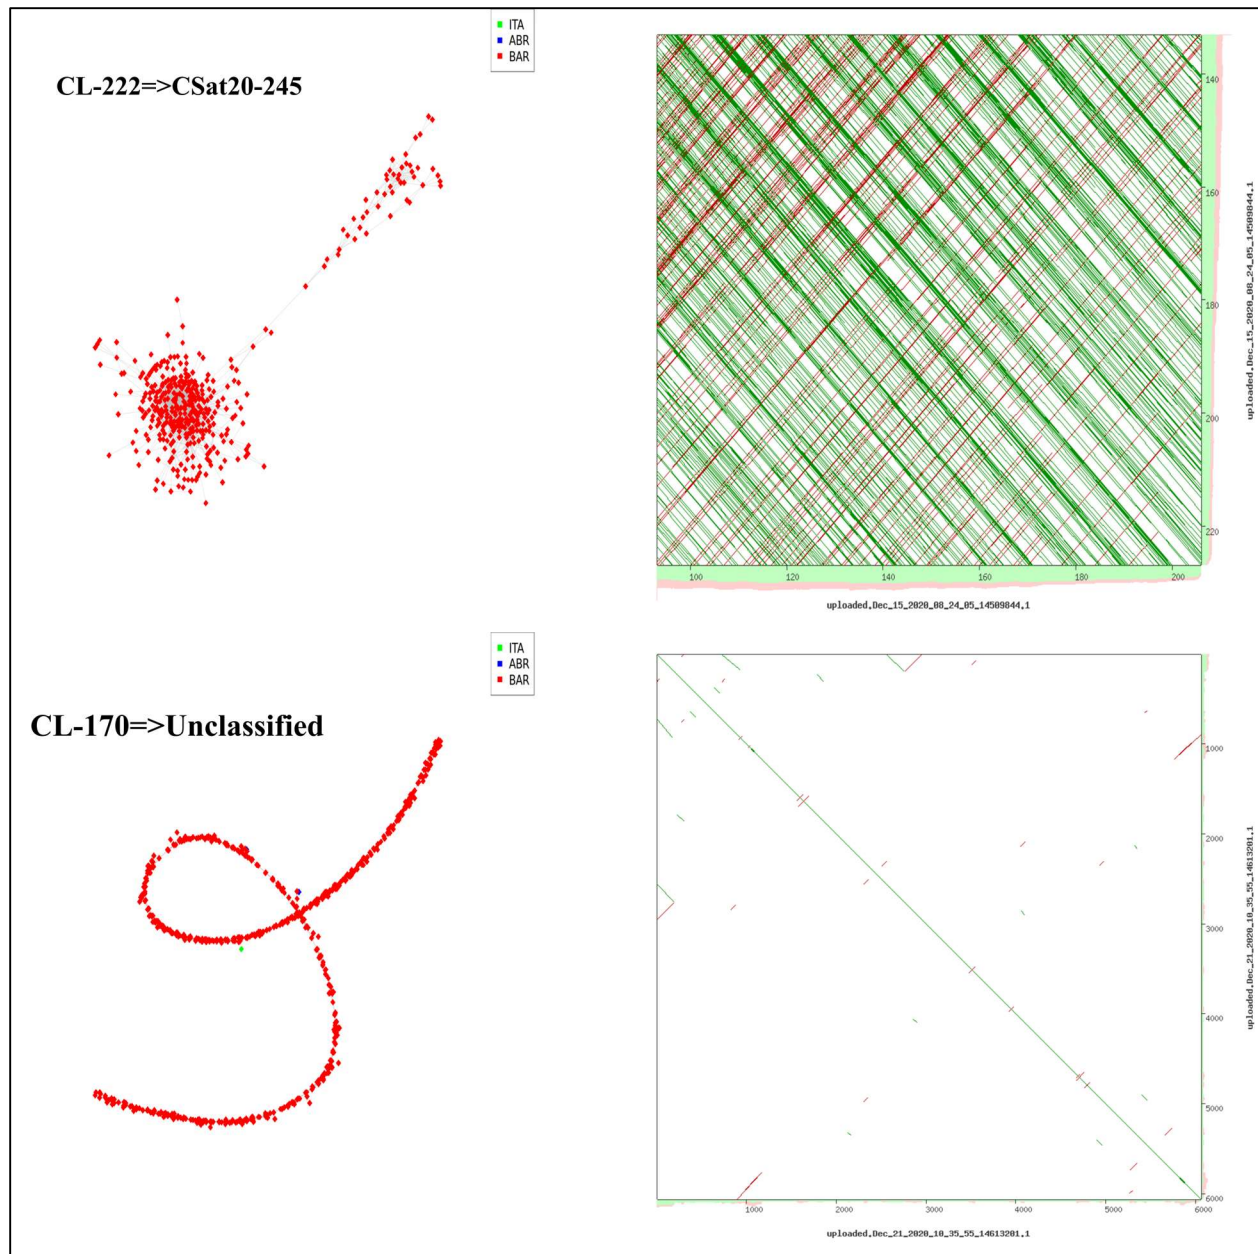

**Figure S3.** The classification of *C. barbarus* species-specific unclassified cluster CL-222 and CL-170 using the YASS tool. The CL-222 graph depicts a typical layout of tandem repeats, and the contigs in this cluster were compared to one another (Self-comparison). The diagonal lines (green lines) in the graph represent the tandem repeat, which allows us to characterize it as satellite DNA repeat CSat20-245. The other cluster CL-170 has not shown any evidence of tandem repeat and left it as unclassified.

| <i>C. italicus</i> |        | Correlations            |        |           |       |
|--------------------|--------|-------------------------|--------|-----------|-------|
| Spearman's rho     | Length |                         | Length | Abundance | K2P   |
|                    |        | Correlation Coefficient | 1.000  | -.100     | -.267 |
|                    |        | Sig. (2-tailed)         | .      | .684      | .270  |
|                    | N      |                         | 19     | 19        | 19    |
| Abundance          |        | Correlation Coefficient | -.100  | 1.000     | -.067 |
|                    |        | Sig. (2-tailed)         | .684   | .         | .786  |
|                    |        | N                       | 19     | 19        | 19    |
| K2P                |        | Correlation Coefficient | -.267  | -.067     | 1.000 |
|                    |        | Sig. (2-tailed)         | .270   | .786      | .     |
|                    |        | N                       | 19     | 19        | 19    |

Length vs abundance ( $r_s = -0.1$ ,  $t = 0.684$ ,  $p = 0.68$ ), Length Vs K2P ( $r_s = -0.267$ ,  $t = 0.270$ ,  $p = 0.26$ )  
K2P vs abundance ( $r_s = -0.067$ ,  $t = 0.786$ ,  $p = 0.78$ ), Length vs A+T ( $r_s = -0.322$ ,  $t = 1.40$ ,  $p = 0.17$ )

| <i>C. barbarus</i> |        | Correlations            |       |       |       |
|--------------------|--------|-------------------------|-------|-------|-------|
| Spearman's rho     | Length | Correlation Coefficient | 1.000 | -.233 | .477* |
|                    |        | Sig. (2-tailed)         | .     | .336  | .039  |
|                    |        | N                       | 19    | 19    | 19    |
| Abundance          |        | Correlation Coefficient | -.233 | 1.000 | -.086 |
|                    |        | Sig. (2-tailed)         | .336  | .     | .726  |
|                    |        | N                       | 19    | 19    | 19    |
| K2P                |        | Correlation Coefficient | .477* | -.086 | 1.000 |
|                    |        | Sig. (2-tailed)         | .039  | .726  | .     |
|                    |        | N                       | 19    | 19    | 19    |

\*. Correlation is significant at the 0.05 level (2-tailed).  
Length vs abundance ( $r_s = 0.233$ ,  $t = 0.336$ ,  $p = .31$ ), Length Vs K2P ( $r_s = 0.477$ ,  $t = 0.03$ ,  $p = 0.03$ )  
K2P vs abundance ( $r_s = -0.086$ ,  $t = 0.726$ ,  $p = 0.70$ ), Length vs A+T ( $r_s = -0.322$ ,  $t = 1.40$ ,  $p = 0.17$ )

| <i>C. abbreviatus</i> |        | Correlations            |        |       |        |
|-----------------------|--------|-------------------------|--------|-------|--------|
| Spearman's rho        | Length | Correlation Coefficient | 1.000  | .311  | -.531* |
|                       |        | Sig. (2-tailed)         | .      | .196  | .023   |
|                       |        | N                       | 19     | 19    | 18     |
| Abundance             |        | Correlation Coefficient | .311   | 1.000 | -.294  |
|                       |        | Sig. (2-tailed)         | .196   | .     | .236   |
|                       |        | N                       | 19     | 19    | 18     |
| K2P                   |        | Correlation Coefficient | -.531* | -.294 | 1.000  |
|                       |        | Sig. (2-tailed)         | .023   | .236  | .      |
|                       |        | N                       | 18     | 18    | 18     |

\*. Correlation is significant at the 0.05 level (2-tailed).  
Length vs abundance ( $r_s = -0.311$ ,  $t = 0.196$ ,  $p = .44$ ), Length Vs K2P ( $r_s = 0.531$ ,  $t = 0.023$ ,  $p = 0.023$ )  
K2P vs abundance ( $r_s = -0.294$ ,  $t = 0.236$ ,  $p = 0.23$ ), Length vs A+T ( $r_s = -0.322$ ,  $t = 1.40$ ,  $p = 0.17$ )

**Figure S4.** The Spearsman rank-order correlation test. There was no significant correlation observed between K2P divergence against monomer length ( $r_s = -0.267$ ,  $t = 0.270$ ,  $p = 0.26$ ) and A+T content ( $r_s = 0.02$ ,  $t = 0.09$ ,  $p = 0.92$ ) in *Calliptamus italicus* species. the K2P divergence has shown a positive correlation with monomer length ( $r_s = 0.477$ ,  $t = 0.03$ ,  $p = 0.03$ ) in *Calliptamus barbarus* and in *Calliptamus abbreviatus* ( $r_s = 0.531$ ,  $t = 0.023$ ,  $p = 0.023$ ).

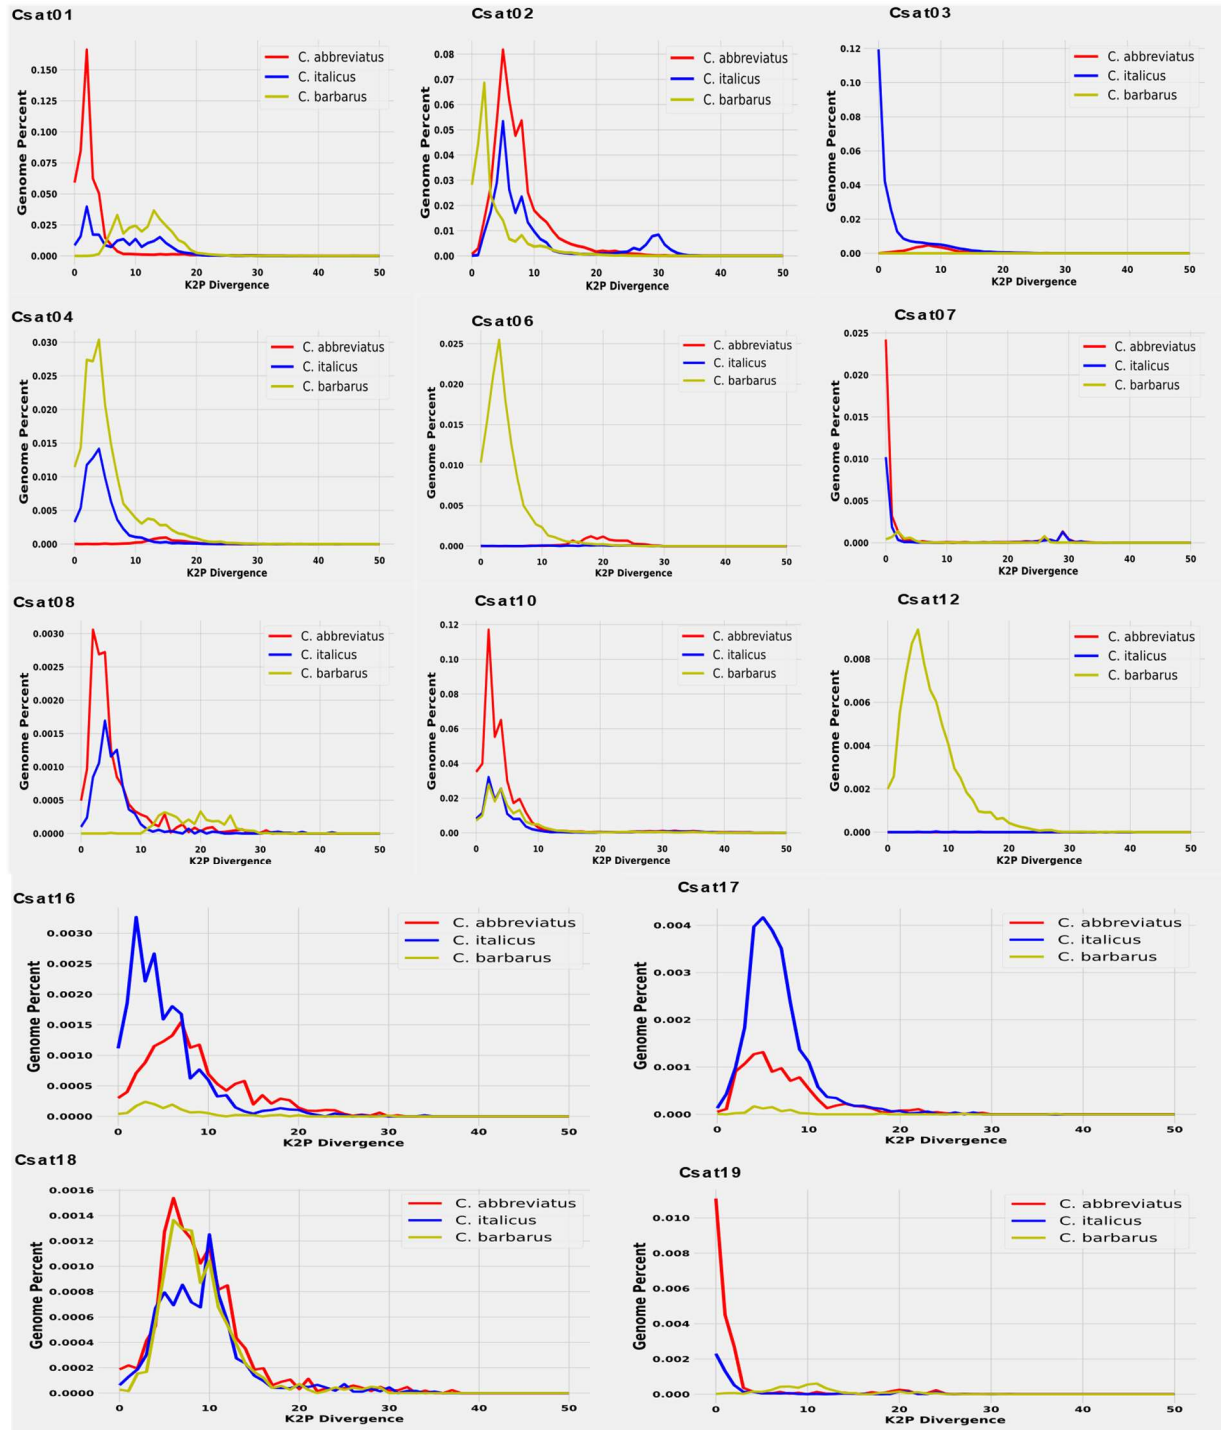

**Figure S5.** Satellitome comparative line graphs with single-peak and flattened distribution of abundance against the divergence.

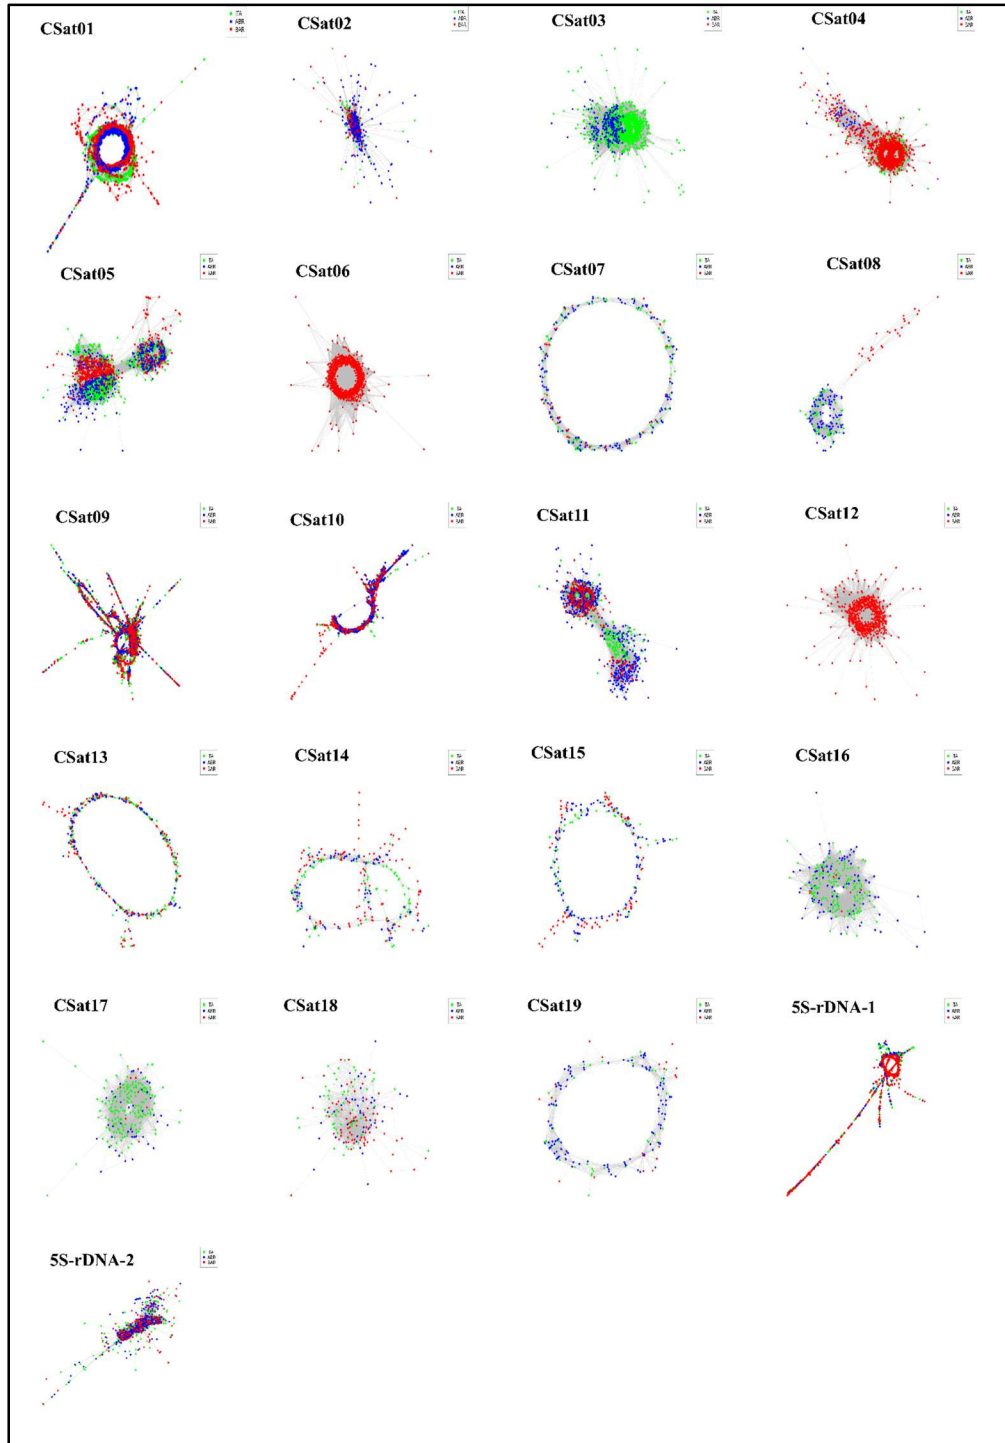

**Figure S6.** Satellitome graphical-structures for each family of satDNAs. The comparative graphical structures of satellite DNAs and rDNA-repeats reported in the Repeatexplorer2 output. Colors in the graph represent the species-specific reads (green-for-*italicus*, blue-for-*abbreviatus*, and red-for-*barbarus*) where the node denotes a specific read and the edges as a bridge (connecting lines) between the similar reads.

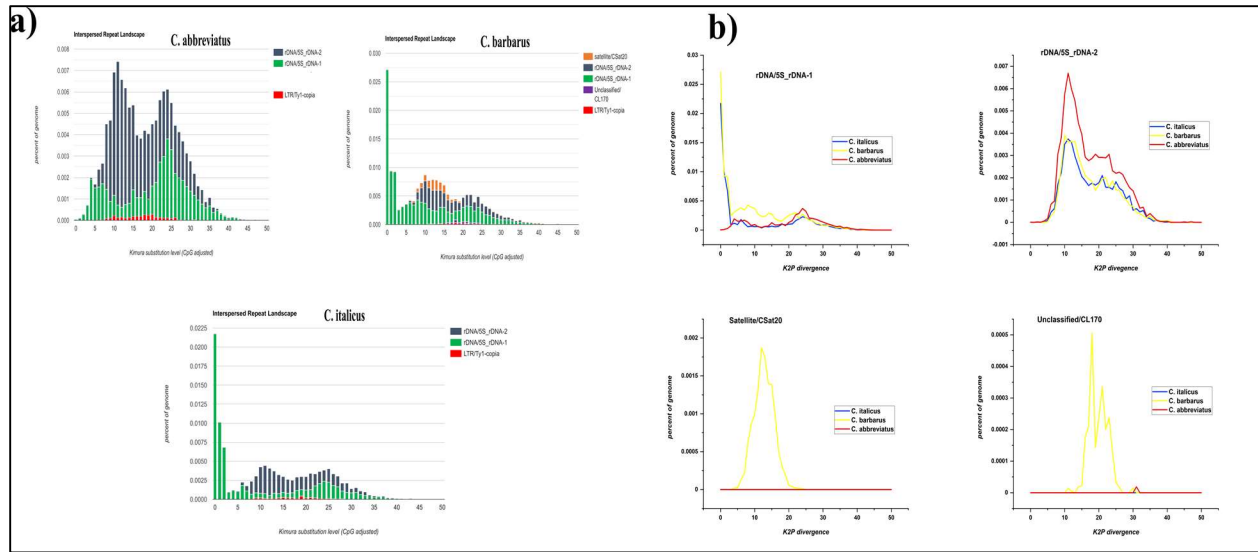

**Figure S7.** Interspersed repeat landscapes and line graphs of rDNAs and CSat20-45 family. The interspersed repeat landscape of rDNA-repeat, CSat20, and unclassified cluster has been shown here (a). In *C. barbarus*, a distinct individual repeat landscape demonstrates the existence of a single abundant peak of CSat20-245 satellite DNA. Similarly, the recent abundant copy of 5S-rDNA-01 in *C. italicus* and *C. barbarus* revealed one peak and multi-variant flat distribution in *C. abbreviatus*. There are two peaks of 5S-rDNA-02, the recent one and another ancient/degenerated highly divergent copy (b).



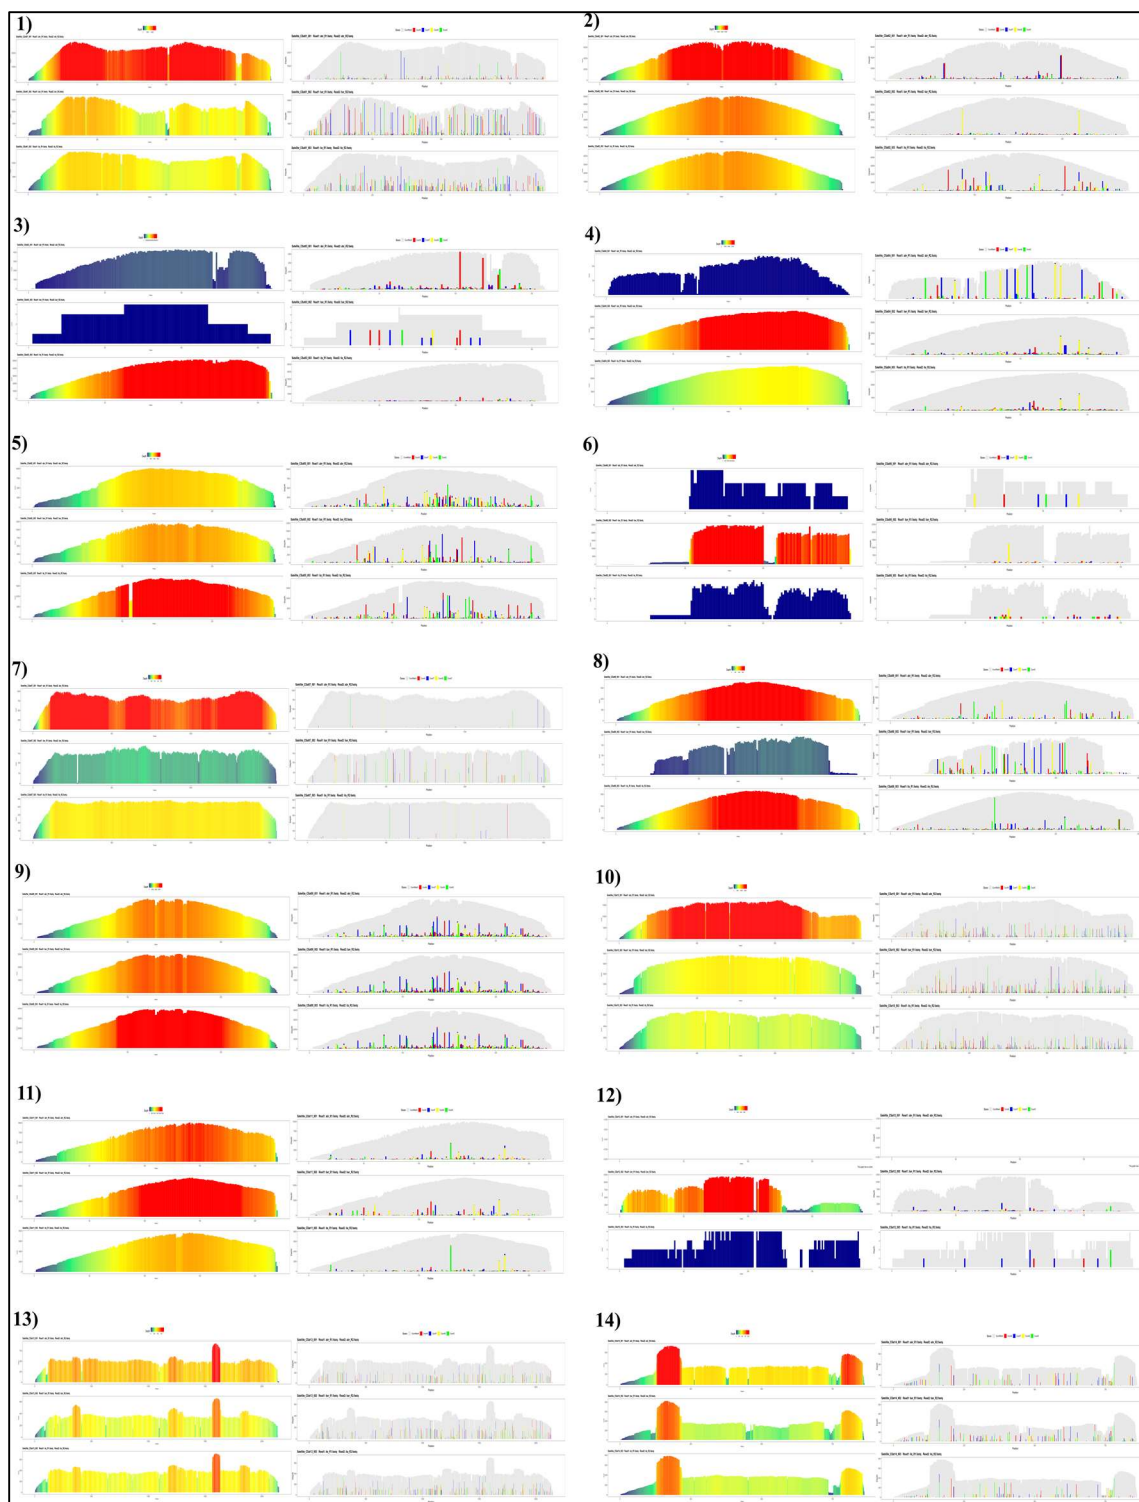

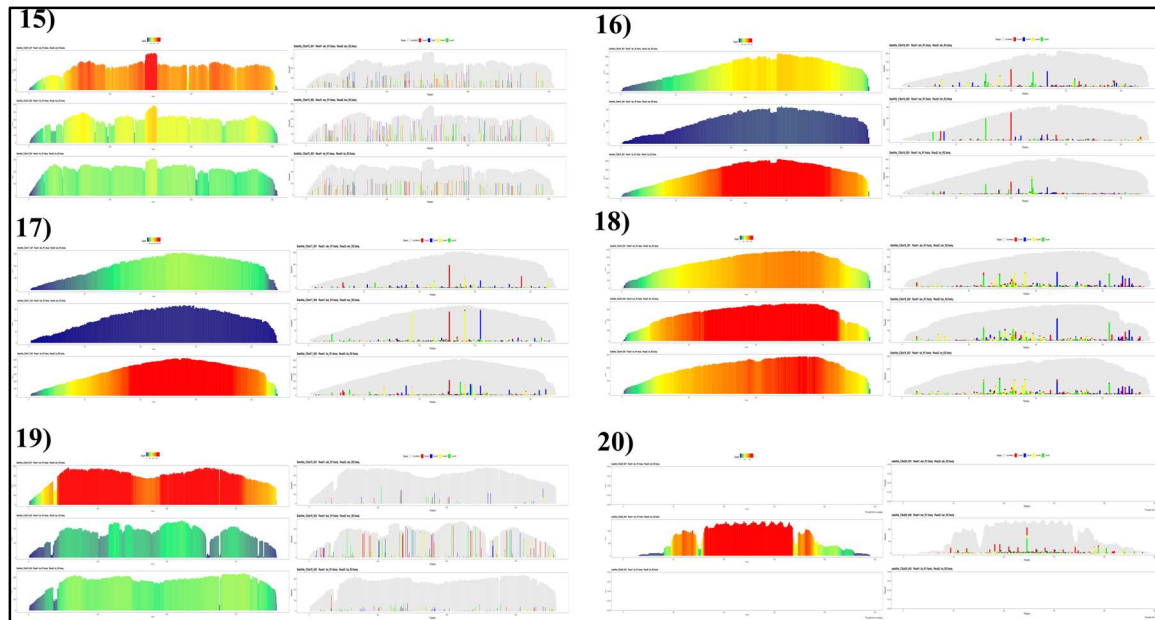

**Figure S8.** The individual satellite DNAs repeat and variant profiles demonstrate the strong species-specific signatures. Species profiles arranged in a sequence of *C. abbreviatus* => *C. barbarus* => *C. italicus*. Most of the satDNAs profiles have shown reasonable read depth coverage with the decrease of variation in the variant profiles, which are represented in dark red color. The CSat12 profile uneven coverage of repeats with sharp boundaries shows the differential amplification of fragmented copies of this repeat, implying the novel spread of satellite DNA sequence. Additionally, some profiles suggest the residual existence of some of the satDNAs degenerated copies such as CSat12 profile in *C. italicus*.

## The detail of consensus sequences of the satDNAs and 5S-rDNAs identified in the current experiment.

### >CSat01#Satellite/CSat01

gtaataggcagccactaagcagagtgtcgcagtgggaagcttactgggaccataactcacaggtccgtggatcgaaaccaagcctataagt  
atcgtgcgcaatccagttgtgccactggggctacagcacagccttccaaacagccatattcacattaaatccgtcgtgtagcgaccagaaat  
acgtcatctatcgtcatttacggctgtactgagacttcggcaactgcctacgaatgattcacactactctactttggtacaacgattacttgcaa  
atggacagcttttagtcacggaatacgtgcagaaaaccgcgccttgcgtttgctaactgacacacagcgaaacaaggtaggtggcgtg  
ttctaagttctgaaggagcacagcgaatgcgcatctccagcagaggcgctttccttgggtgctgccagtagggcgagaaggccagagg  
gaagatgctatcgttgccaatggacaaaaggaaaaacaaaagcagaaaaaatccttccttgtgtagcaacacttttctgcgagactgagg  
agaaagcagtggcctgtgacgcaacggataacgcctctgaccacgggcagaagattccagggtcaaactctggcaggggtcgtaattttgt  
taattgggtggagcgttgctaggcaacggacctggccatcttactgctcttattcccacgggtatttcgagttgcaagccttgctgacacgata  
aataccgcctcccgaagcgtcagcgtagcgtcagtcgagcaagtcgagccaagtcaagctgagagctgtaggaaatgctgcacatcttaa  
attagatataaaaaacatcgcaggggaagacttctcatgagttccgtgtcagag

### >CSat02#Satellite/CSat02

gaatatagtataaacagcattggcgattcagtgaaatttccgaactttcgtcgtgtctaaacgacttgcaagcgtttggcgctcatggcgca  
cctcagcagccactgggcagtgctgggacaaccaaagaatcgatttagtataaacagcattggcgattcagtgaaatttccgaactttcgtc  
gtgtctaaacgacttgcaagcgtttggcgctcatggcgcacctcagcagccactgggcagtgctgggacaaccaaagaatcgattgaata

### >CSat03#Satellite/CSat03

gttagttgattcaatcgagatgcgaagagcaggattatgatgggaagcgttttgcgggcatggggcaactcagtaggcccgggatagt  
tggggacaaccgtagaatcgatcgaatgcaggtaacaggagcactggcgatgggtctgaaatttctaaat

### >CSat04#Satellite/CSat04

gcttctaagggaacgtccttctgtgtgtgctgactggctcgtgaacaattgcacatattgtcgttgaatacagtgctaaattaatgtaaag  
ccactgagctacaccgggattttcatacatatccagacctgtatcgacaaaatcaactgtttcggagagtctcgtaatttgcgttc

### >CSat05#Satellite/CSat05

ccttccaaaagtatttcacgatacaaaaagtaggtgtttcataatcagcatccatccagtagcgacagtgtagcgttgcagagttaatttc  
gtttcgtattagttttacaagcaatcgacgactgagaaataacattgtaagcctttgtgtaacttctgtccaaaatctatttgtgtgttaacgcct  
atggcattaaacataggttgaaaattcccccttaagggggaaatggggcctcctcctcccttacagcccgccttt

### >CSat06#Satellite/CSat06

gtcgaggatttggctacctaagagacttaagagagtcgaggatttggctacgatttggctacctaagagagtcgatgatttggctaccta  
agagagtcgagcgaggatttggctacctaagagagtggaatttggctacctaagagagtcga

### >CSat07#Satellite/CSat07

actctgtcacacaccagaaagttttcataacgcaggcgttgactacaacagcttcccttcacagacgacttatccgactttgcacgacgt  
cacgcagcgtcacgctagcgacatcctctcttaaaacttcagtcgagcctaaaaatatgagcacgtatctcctaggacacagggccacctc

ctaccgttggtgcacgatgtgtggagtcagcgcagggccgcaggctttcactgttcacgcctacaaaacctctgctcgttgtaaagagctg  
aaaaaatcgcgagactccatgtcgtacacgatttcattggcacgacatctgccgtcaggtgtctcaacctcaacatcagcagctccccga  
atggacgtgaaaaaagaaagctgtactggagatttcattgcttcggcacaaggcagttcttttcgacgcagcttgagtatcttatggaagt  
gcttgtagctcctaagcaaattttggggaacaatggagggctgtgtgcacataataatgcatttactcggagttcagatccattgcage  
cgtaagccttcgcaactgcctttctggtcaccagcacgctcctcactggaccttattgacagctcattgttctacatgctcgccagtcctatgtg  
tttaaaacgttggagacgcgggtatcgatccccggtaacctctcgatgctaagcgagcgtctaccatctgagctacgtccccacactgcg  
atgtgtagcctcgggaaggtaattcagtgacaaagatacaactactgccttcattccgcagacagccactaatctcaacaagcctcgtgaag  
acggcgacaagtgttgactgcacttttagaccagtcccagatggacgtatgcagagtagcactcactatgtcgaaaatgattctaaggccgt  
tcgctgaataaagctacaaccttgctgctgatgtaagctgttacacctagagacgtttcaccttgaggcagctcgagtgctgaaaatcct  
ttcatcacagctcacatcacctcgctcagtgctccatcctgtgtgattctgacgctgctttggacatttcgctgattacgagaaggctcgacaa  
cttacgcttaccaccaagggagtacaaaatttggaggcgccggggtgaacccgggacctttcacatgcaaagcgaacgctctaccagct  
gagctacgccccacgtgctagtaaacgctctgggtgacctcctctgttcttactctgcactaacagacgttcacacagacagtatgtctcg  
ttgctcacataaaataagtaacaacttttgccagctgttacgtcttacagtgaaaggtaacttggcataatcgctcctttctcgctccctgtcgacaatca  
cacagcaagaaagtaaacacaagccaatctcaagtcggctgctgcactgactgtgcataatcaactagctgcctcacagggttttactgcgtac  
cacgcgggtcttggaaactacatatgggagagcttctccattttcacg

#### >CSat08#Satellite/CSat08

tatacagctcacgtggtgtagtgcggtccgccaccatttacctgaaatgcaagctccagacatgacctggcgtaagaaggaaacgtgc  
ttatttgagcaggcaatacgtctccaccattcgacttaaacgttccctccagtcataactgatgaactcgtgtaataatgtgggcacaca  
tattggctcatatgcagagctgtgtttccaatgtgtgttttcatggcggaaccaatacgtgctgtcttcaaatctaccacattctgccac  
ctaccattc

#### >CSat09#Satellite/CSat09

tacggatttcgacagaatccacagttttattccgatcttgatgaaattttgcacacttgaccttcaaaacaagaggaaggctactgtctacataa  
aatttcgtatggtgcatggcggagggtactttacttacggacttcgacagaatccacagttttattccgatcttgatgaaattttgcacactga  
ccttcaaaacaagaggaaggctactgtctacataaaattcgtaggtgcatggcgagggtactttact

#### >CSat10#Satellite/CSat10

taaccgtttaaatagtattttaccctgttcatttgaactcttgaataacattgtattagatcgccacacctaattcagggatatacacgtctcacag  
tattggagccaacattttgagtgaatgctaaaatatgtgtcagattctgtttctgcgttctcgttgataatgctaggactggcagggaaagta  
agagcctccttaagtactaggaagatctttctgcgcctcattccagtaaaacttggcatctccctgcagaagttcttgaatggacgtgcctt  
gttacagaaatctttatgaagcgtcggttagtacgagcacatcccagggaagcttctcacatcacgaatgtgtcggttagttggcaattctgt  
gactgcccttattttctgtatcaggacggactccatctccgttaactagggtgccccaggattttatctcttgggcgacaaataggcgcttct  
cggattcagacggagacatgcagttgaacacacttcaacacagctgacaggcgactcagatgttcttcaaatgttttcgagaaaacgacaa  
atcatctagatagcaaagacacgtcgtccacttaagggtgtcgaagcaagtagtccatcatgcgtttgaatgtggccggagcattacatagtc  
caaatagcattactttgaattcatagaggccgtcaggtgaataaaagccgtcttttcctgtcagcttcgtcaacctcgatttgccaataacct  
gtttgcatgtccatggttgagaaatacttagcacattcaagcagctaaagggtgtcgtcaatacgcggcagtggttagacgtctttcttgtga  
ctttgttcagccgagataatcgacacagaaacgccagtgccatatttcttcttacgaggaccactggagaagaccaaggactctctgag  
gggtgaataatgtctcgtgcagcatcttccacttctcccggtcattcgtcttcagctgggtgacatcctatacgaatgctagctaattgtag  
gatgatccccagtggtgatacggctctttaccgtgggctgttttgcatggctcttctcctgctgggctttgaatgcacccgaaaattggcgtagt

atagctaacacctgctggcggtgttcttgggtcaggctgggcccatttgaattccacagttgtccctccagcggtgtgtctgtattaacaac  
agagcatgggtcttcgtgaa

### >CSat11#Satellite/CSat11

tattttgattgcagcagccgctccccagcgaagaggacgccagtggactacgatcaagacacccccacacaaaggcttctttgagatgtg  
ggcaagggaagaaatttcttcattttggtaagtatttttgacgtttctaagtgtatataattcactcagtgcgtacactaggagatatctaca  
aaaaatggaagcttaattaacattttcatgcc

### >CSat12#Satellite/CSat12

ggggcggttgcaactgcttctggggcggttgcaactgcttctcaactgcttctggggcggttggttctggggcggttgcaactgcttctgg  
ggcggttgcaactgcttctggggcggttgcaacggttgcaactgcttctggggcggttgcaactgcttctggggcggttgcaactgcttctgg  
actgc

### >CSat13#Satellite/CSat13

cttgacgctgttgagtggacaggtgaaacgcactgccacctggttgcctctgagtagcttaaggcggtgctgtgcagccactgtgaaatga  
aggagtgtgtcgtgtgcctgtgtcgtcacctcccctcgtgtctctcagtcgattttgatgcttgccttgatataggccgaactgagagcgta  
gctctcgctcagctctcgaaagtcgagacaagtcgagacacatatcacactacgggccgactgcaatgagttgtcgggggaaaaac  
gttaattttaaggcgctgcagacgtgttcatacgaataaagaaggcatgttgcggtggccgggaatcgaaaccggatcaactgcttg  
gaaggcaactatgctgaccattacaccaccacgcacggcgcggaagagagttacgccgaggcgatcggttcccgcctgccagcagc  
ggccgaagttgatcgtagctgtaggcgattacgatgtaggtgagcacatccacacacattcggacaacgcctttacgcggattttgcgtctt  
ttcacgacagacgccaccgacgccgactcagaggatcgcatgtagcgtcattgtaacgagtagactgcaggactctgttcaatagcgt  
gttttcgggaggataagacagcgctaggcggcagtccttctcactgcaaacgactgctgaggaagcaccaggaagctcatctccagcc  
gagcatcggttggttcagtggtagaatgctcgctgccacgcggggcgcccggttcgattcccggcgatgcatcattttatagtttctgca  
acaattcggccgatgcttacttatttgagctgcacgtgcttcaattatgtccaccgggactcgctgccagaaaaacaaacatgctgcacgc  
acgagacgttgctggacgctggcgccgaaatgtcagcagactatggtcggctcggcgctacgagttgagtgctcgttgggtgcttggtg  
atgtggcgtaacggacaagcggagctgccttcggtaggaaaaatcgagctccatttaacctgctgagcagacaatgtgcatgtagcagc  
tgaagacaccattaaggaagcaaaactgccctaatttagagtacttacaaatttctagaagcgtgcaagccaggtgcctcggtagcgca  
gtaggcagcgcgtaagtctcataatcttaaggctcgtgagttcgatcctcaccggggcatttaatttagtctcgatcagcgccgaattcacgg  
cggtgctgttgtaggaaacgatcttatttgttgttgaaccacgagttttgcagcacaaaacgagaaaatttttgctccagctgttact  
accttgcttcatctctcgcgtaggaatacacgatgcaaaaagcgatgggtcttttctgtgttctcgacatttagtatacgtaaaggttctcac  
aaaccgagaggcgcgccgacgcagactgcagattggacacgaatacgcattggagtgctgtaaacgagacgttggaagtgcgtctcc  
ggtgtggtctagtggttaggatacctggctttcacccaggaggcccggttcgattcccgggtaccggaacagaattttccgcacacaact  
cgtagagttttagccctcgaaataccgtttctggtcctcctcgtaggattagtagtaggacctgaataacaggagaagagcgtgctatgcc  
attggacagcaacatgcaacgtgcttctctgtatcgagcaagggtctgtttcacgaggccggttagctcagttggttagagcgctcgtgcta  
ataacgcgaaggctggtgggttcgatccccccacgggccacgtcgatttttctattgaaaaaaccaacgccgattttcgacaggcaaatggtg  
gcaaatgtcattacttttgtgtggaactgagacaggatccgatcccgatttgcgagacacgcttcagccttcatccttaacggccatatcac

tttgaataacctgtttctcgtccgatctccgctattagcaactttgggccttgtcattatttgggtgtgacagccggggaacacaaagtgtg  
tcgactgcattaacttatttgcctcat

#### >CSat14#Satellite/CSat14

ctccttcgtagcagctagtgttagcgatgaaagcacttcggaaaataacgcaggtacatcgcttaattgtcaacataattgctctaaactgca  
gcaaattgcatacgtctaaagactgttcgtcagcaagcagtcgtggccgagtggttaaggcgtctgactagaaatcagattccctctgggag  
cgtaggttcgagtcctaccggctgcgttcgattttgaataaaaacaagcagatatttcgcagaaatttgaaagatgccgataacaggtgga  
agcagggccactgatgcagttaccaacaagacgcggatttctgttttaggaatgtttatttagttcacgacggccgctccttctgtacagccatcg  
gttcacctgcaccaagcgtacgacagcgccattggactaggacggcagagcgccagcactgagccacgaggccccagtcgtttcgtcga  
gccgtctcgggtgtttgtaaacacgcaaggtgctgcatgtactagaaagtgtagtgggcagcgatcactcattactgttcttaaatttcggttc  
attctttcgattacgatttccgttatcaggcagcggttccttgtcttatagatctcgagctacttggaaagtgggtccatcatttaagatcccgcaa  
actagcgtcagcgtggcgctcagtgagggaagtctgtgaagtcgccagtggagccagaagccagtaattgcaatactacgcattcacacacac  
atgtgagttggcatgcactccacaatcgccgtgtgtgagaccggatagctcagtcggtagagcattaggcttttaacctaagggtccagggt  
tcaagtcctgtccggggaagatttaa

#### >CSat15#Satellite/CSat15

gaactgtgatgtagcaaaattatcggcacagcgccgttcgagagagtttggctgacacctccacgtctaagacaggatatgactgctacac  
tgtaagtattgttaaaatcgagtaaacgtgtttgttaatggcaccactacttccgtaggtctgcattcagttgtcacctctcagagacctttgc  
aatgaacaaaaatcacttgcagaaaagacattagacggttaagaagagatcgtgtaaggaccacaaggccgaacagtagtgttcccat  
gtgattcgttcacaagcaggcggtgtgcccggctagctcagtcggtagagcatgagactcttaatctcagggctgtgggttcgagcccca  
cgctgggcgaggtagaattttgtctcctgcagattcaagatgcctttgtttatgaaatctacttaacggacgtagctgcatagcagctgc  
ctggctctactacagtctcagagaaacgatactggaagctgcaggtgattcggtaaacacggtaaaatgccttgttctgaaagtacaggtg  
tcgttcgttgttagtacaccggatatgtgtgagacatgatggggagcagtaatgacgcttcttagttgcaaattttagtcgtaatacatgtt  
attttcaggtgaagccagacgattcacatgcttgcattggacgaagtaccagaaggcacaacgggcgccgctcttagctcagtggcaga  
gcactggtctagtaaaccaggggtcgtgagttcgatctcacaggaggcaaatgcattttgaaagcagttgcgcttctggccatttcgaa  
agttctttccagaaatacgaagttggcaatgggcatcaactacaatacaaatctcgcatgtgaatagggtggaatgttgttttaagtag  
gtcgcaaaacggcactgtttttggcggtttaaagggtatcgatgccttctactactcgatcccttatttttacgagtaataaacactctcg  
cgaatgtcgtcgtcgtcggcgccgcccgcctcttgagcagtggttggtcaaacgccattgtatgacaagcaggggagggaccacctgctgt  
cgattgagaaggcagtttagtgttggctctgatttcgaaactctgtttcatcagtcacatacgttggtggaaaatgacgggtgtataggaaaca  
ggaagacgaagcgtcgcatttttagcagtgaaatttgaggtcaagaatggcgccatagagggaagcaccttcgttaaggtgtacgacgtt  
tagaaatgagacgtatgtaaggaggtgttgaacgtcagtgaccgtgtggcctaattggataaggcgtcggacttcggatccgaagattgca  
ggttcgaatcctgtcaggtcgtgttttccactctgcaaaagagacataaccgttttactgtgatattagagcaatacaaaaccctctcaaagtt  
tcagcgtccggctgcagtttgagagaccagtttgagttgactgacaagac

#### >CSat16#Satellite/CSat16

atacagaagcattgtggtcactcgccaagctgggggttaaataatttttagcagaagatgtgaaacaagcaggagcctgtgttcttttaggaga  
gagcagtggtgtgtgtgtgtttatcctttttgacgtttacttggggggctctgccatgtaatacaaaagccttttgtagtaactgaatcacaggtt  
ctcccctaacacttataaaaaagaaacagatatcccc

#### >CSat17#Satellite/CSat17

gcagcctgggtagcctaagtggtaacaggaggataaactgttctcaaatttctgccaggtaggtagacacaggggtgctacgccacagccta  
aatattcggtatgtctctgtaatatataggggtgtggctactcgccagtcataattgttaaaagagtaatttttaattaacgaaaaatgaagctg  
ggaagtatcattccaactcacctaccccaaaggagg

#### >CSat18#Satellite/CSat18

cggcgctccaatttcagacgtccataactaaataaataattcgtcgtcgcgaatatccactttcagcatccatagtagactacttatttagttatgtga  
caaaaaatcaaatcatttctatggctctattaggatctataggccactgaataccgaaggaaatacgcgggacgcctgggtgctgctct

#### >CSat19#Satellite/CSat19

aaatcgaggtgaaatgcagaaaactcgactcaaatacaaaattcagaaagtcgtccattatacacatttactatgtatgacaataaaacgtcg  
tcgtcgtcgccgccgacgcacgtcatatggaacacatgccgtaaaacacggaatagtgcttagaaacgcaggggtgctaccgacagtatg  
aaaattcgacagggtagcaactgaccaatactggacaggtgactcgataccgctgcattcgtactgtcctaggagggtcttaacgttgtct  
gctgtgagtatatggacctgaaagtgaatactgggtgtacattctgcactacatctttgcggcggtcgttgcggacgtcaaacgagggcgga  
agcttatggttgcgtagtgtggcgccagatacacatcaagaaacgagctacaagtatagtaaatacatgaaatgagggtaccacacgcaa  
gtgtcaggatggccgagcgggtctaaggcgccagactcaaggagcaccttggctgcaaatgcagcctgagccttctggctcctcgtctgag  
ggcgtgggttcgaatccactcctgacaaagattttactctttcgtacacaagtgtgcacatcgagagaacgggtgtaatggggtaaaac  
atgcagaaacgcacatcttgcgtggaacctacacctgccctatcaaaactcaactctgcaatagtgtgaagcttcaaacgcagagtactggttgca  
aatgcggcggttaccctccgctgtctcactgacctccagctcacagtcgcacaaatattataatgagcactcgagatcttactgaatgtgtct  
agacgcaaactgctaatacgaatgcaaggaaacactacatccttaccactttacgaggttaaccctct

#### >CSat20#satellite/CSat20

gacctatgagcatgaatgacccaaatgacctatgacctagacctagacctaaagacccaaaagacccaaaagacccaaaactaaaagacccaaa  
atgacccaaaagacccaaaagacccaaaagacccaaaagacccaaaagacccaaaagacccaaaagacccaaaagacccaaagagccc  
aaaagacccaaaacctaataaaacacaaaaggcccaaaaaaaccaaaaagaacaaaagcccaaaaa

#### >5S\_rDNA-1#rDNA/5S\_rDNA-1

tactggtgtttccataagaaataacattaccgaaatgaacatgacattccatagtgatgaaaatacagagaataatgggcggggcaaaagct  
acgaaatgcactgtgagaagcacaagctgtatgattccagaggcattttgtgaaataaagtagaacctgttactcagtagcagtgtaatttc  
cccatttgtaataaagtttatctcttttcacatgtcccaacgcttaatgccactgttttcgaacgtctcgccgctctcgagatgtttatcat  
ccttttgcgtcatatgggccagaccccgagcggcagcgagcggcagcgagcaaaagtcgggacaagtcgggacggaaggggagggg  
gcacctgcgaatgcagcttgcactcgctataaatgcctctaattttgcgagttgcgtgtcgcgagctttacctcgctagcagtggcgctctcc  
agcacgacaatgcggtcgctgtgacgtgaagcatagtagcgtgcaacgtcccgcctcctcgcggaagtgactggcggtgatatagggc  
agcccgctcgacgtggcgggccacctgccaattcggcagacgctcctggggcgcgaaaggcgcgccctgtggcgggagaagatg  
cattccatcaaattaccgacctgtttctgccgaaaattcaactttagggtgtcaccagaggagcagaagccgattcctggcgcgccactacatt  
ttactggcgccaacggccatacaacgttgaatacaccggttctcgtccgatcacggaagttaagcaacattgggcccgggttagtacttggat  
gggtgaccgctgggaaccgaaataaacacgaggtacaaaattgatgaaaatgggagaacaaatgagtgaagcaaaactaccaactgt  
gctttgataataacgaagctgcatgagtgagtgatattttctgaaatattacagagccattactcagtagcagtgtaattttccgaatttga  
aataaagggttatctttatcgtaaaaaatgggtgctgttgagctttttgtctcctatttctacttttctccacccccctcattgttaaactaccgt  
tttcttgc

#### >5S\_rDNA-2#rDNA/5S\_rDNA-2

gtctgcgggcgctgttggcaagcggggtgcactcaaccctgtgaggcaaattcaggatcaacttgattgagaagtagcggctctggtctt  
gaaaactgacatacggccgagagagcgggtgtgctgaccacacaccactccataccgcagccggcgacgcatttgggccgaggatgacac  
ggcggcctgtccgtaccgatgggcccttcgcggcctgttccgt

>CL170#Unclassified/CL170

tgttttcaaataatccccagcaccgacacacagtatggtactcagtgtcagatacagcaggaaaatctgattgcagtgtagggcccaagt  
tataaaaaatttagtatgcagcattgtagtacttgaactcaaaaggaacaaacttcggaccctataaagtcaaaccaggaatcatatctga  
cgcaataagtat
